# Supplementary material for: The Contribution of Environmental Enrichment to Phenotypic Variation in Mice and Rats
Source: bioRxiv preprint, doi:10.1101/2020.07.11.198705, version 3 (2021-02-01)
Supplement: Extended Data File 4-2. Pairwise Comparisons [file 198705_file06.docx]

**Extended Data Table 4-2**. Pairwise comparisons for treated/manipulated controls and treated/manipulated enriched rats and mice in which all behavior, physiology, and anatomy traits are combined.

| Description | Trait Category | Mean | Standard  Deviation | Standard Error | 95% confidence interval | | t | df | p-value  (two tailed) |
| --- | --- | --- | --- | --- | --- | --- | --- | --- | --- |
|  |  |  |  |  | Lower | Upper |  |  |  |
| Main effect of housing | all traits combined | .036 | .770 | .034 | -.030 | .103 | 1.071 | 513 | .285 |
